# Supplementary material for: Perception Accuracy of a Multi-Channel Tactile Feedback System for Assistive Technology
Source: MDPI journal article supplement (doi:10.3390/s22228962), 2022-11-19
Supplement: s1 [file s1]

### Supplementary Material

The following tables summarize results based on statistical analysis for significance. Evaluation was based on nominal (binary) variable analysis using two-sample proportion tests for significance.  $H_0$  is that proportions are equal in the groups.

#### 2-channel

| excitation points | task                          | result | test statistics             | significance (p<0.05) |
|-------------------|-------------------------------|--------|-----------------------------|-----------------------|
| wrists            | detect 235 Hz L and R (S1)    | 27/27  |                             |                       |
|                   | detect 300 Hz on the R (S2)   | 9/27   | p-value: 3.0E-7<br>z=5.196  | YES                   |
|                   | detect 185 Hz on the L (S3)   | 9/27   | p-value: 3.0E-7<br>z=5.196  | YES                   |
|                   | detect shorter on the L (S4)  | 13/27  | p-value: 1.67E-5<br>z=4.347 | YES                   |
|                   | detect longer on the R (S5)   | 22/27  | p-value: 0.02<br>z=2.348    | YES                   |
| ankles            | detect 235 Hz L and R (S6)    | 27/27  |                             |                       |
|                   | detect longer on the L (S7)   | 12/18  | p-value: 0.012<br>z=3.222   | YES                   |
|                   | detect shorter on the R (S8)  | 6/18   | p-value: 1.0E-6<br>z=4.954  | YES                   |
| arms              | detect 235 Hz L and R (S12)   | 18/27  | p-value: 0.001<br>z=3.286   | YES                   |
|                   | detect shorter on the L (S13) | 7/18   | p-value: 0.066<br>z=-1.837  | NO                    |
|                   | detect longer on the R (S14)  | 14/18  | p-value: 0.420<br>z=0.805   | NO                    |

Comparison:

#### WRIST

Detecting 185 Hz and 300 Hz compared to detecting 235 Hz: significant (p-value: 3.0E-7, z=5.196152)

Detecting shorter on the left compared to detecting the normal: significant (p-value: 1.67E-5, z=4.347413)

Detecting longer on the right compared to detecting the normal: significant (p-value: 0.02, z=2.34738)

Detecting shorter on the left compared to detecting longer on the right: significant (p-value: 0.018, z=2.3473)

#### ANKLES

Detecting longer on the left compared to detecting the normal: significant (p-value: 0.012 z=3.222)

Detecting shorter on the right compared to detecting the normal: significant (p-value: 1.0E-6, z=4.954)

Detecting shorter on the right compared to detecting longer on the left: significant (p-value: 0.045, z=2.000)

#### ARMS

Detecting 235 Hz on the arms compared to on the wrists and ankles: significant (p-value: 0.001, z=3.286)

Detecting shorter on the left compared to detecting the normal: not significant (p-value: 0.066, z=-1.837)

Detecting longer on the right compared to detecting the normal: not significant (p-value: 0.420, z=0.805)

Detecting shorter on the left compared to detecting longer on the right: significant (p-value: 0.018, z=-2.366)

*4-channel*

| <b>excitation points</b> | <b>task</b>                      | <b>result</b> | <b>test statistics</b>     | <b>significance<br/>(<math>p &lt; 0.05</math>)</b> |
|--------------------------|----------------------------------|---------------|----------------------------|----------------------------------------------------|
| wrists and ankles        | detect 235 Hz<br>(S15)           | 27/27         |                            |                                                    |
| wrists and ankles        | detect shorter on the R<br>(S16) | 6/18          | p-value: 1.0E-6<br>z=4.954 | YES                                                |
| wrists and ankles        | detect shorter on the L<br>(S17) | 18/182        |                            |                                                    |
| left ankle               | detect shorter<br>(S18)          | 12/18         | p-value: 0.007<br>z=2.683  | YES                                                |
| left wrist               | detect shorter<br>(S19)          | 18/18         |                            |                                                    |
| right wrist              | detect shorter<br>(S20)          | 18/18         |                            |                                                    |
| right ankle              | detect shorter<br>(S21)          | 6/18          | p-value: 1.0E-6<br>z=4.954 | YES                                                |

## Comparison:

Detecting shorter on the left compared to detecting the normal: not significant (p-value: 1)

Detecting longer on the right compared to detecting the normal: significant (p-value: 1.0E-6, z=4.954)

Detecting shorter on the left compared to detecting longer on the right: significant (p-value: 2.89E-5, z=4.242)

Detecting shorter signals on the ankles compared to normal signals on the wrists (left and right):  
significant (p-value: (1.0E-6, z=4.954); (p-value: 0.007, z=2.683))

*8-channel*

| excitation points | task                               | result | test statistics            | significance (p<0.05) |
|-------------------|------------------------------------|--------|----------------------------|-----------------------|
| all channels      | detect 235 Hz (S22)                | 27/27  |                            |                       |
| all channels      | detect shorter on the R (S23)      | 3/9    | p-value: 3.0E-6<br>z=4.648 | YES                   |
|                   | detect shorter on the L (S24)      | 9/9    |                            |                       |
| left ankle        | detect longer (S27)                | 9/9    |                            |                       |
| left wrist        | detect longer (S28)                | 9/9    |                            |                       |
| right wrist       | detect longer (S29)                | 9/9    |                            |                       |
| right ankle       | detect longer (S30)                | 6/9    |                            |                       |
| arms and head     | detect longer (S25, S26, S31, S32) | 0      |                            |                       |
| all channels      | detect P1 pattern (S33)            | 6/9    | p-value: 0.002<br>z=-3.133 | YES                   |
| left ankle        | detect S.O.S. (S36)                | 5/9    |                            | NO                    |
| left wrist        | detect S.O.S. (S37)                | 6/9    |                            | NO                    |
| right wrist       | detect S.O.S. (S38)                | 4/9    |                            | NO                    |
| right ankle       | detect S.O.S. (S39)                | 4/9    |                            | NO                    |
| arms and head     | detect S.O.S. (S34, S35, S40, S41) | 0      |                            |                       |

## Comparison:

Detecting shorter on the left compared to detecting the normal: not significant (p-value: 1)

Detecting longer on the right compared to detecting the normal: significant (p-value: 3.0E-6, z=4.648)

Detecting shorter on the left compared to detecting longer on the right: significant (p-value: 0.003, z=3.000)

Detecting 235 Hz compared to P1: significant (p-value: 0.002, z=-3.133)
